# Supplementary material for: Systems Pharmacology Dissection of Multi-Scale Mechanisms of Action of Huo-Xiang-Zheng-Qi Formula for the Treatment of Gastrointestinal Diseases
Source: Front Pharmacol. 2019 Jan 11;9:1448. doi: 10.3389/fphar.2018.01448 (PMC6336928; doi:10.3389/fphar.2018.01448)
Supplement: Supplementary file 1 [file Table_1.xlsx]

## Sheet: Sheet1
Table S1: All active components. This table provides the name of active ingredients and their codes as well as the herb which contain this chemical.
Molecule ID	Molecule name	Herb
BS01	24-N-propylcholesterol	BS
BS02	8β-Ethoxy atractylenolide Ⅲ	BS
BS03	AtractylenolideⅠ	BS
BS04	Atractylenolide Ⅱ	BS
BS05	Atractylenolide Ⅲ	BS
BS06	12-Senecioyl-2E,8E,10E-atractylentriol	BS
BS07	14-Acetyl-12-senecioyl-2E,8E,10E-atractylentriol	BS
BS08	14-Acetyl-12-senecioyl-2E,8Z,10E-atractylentriol	BS
BX01	Sitostenone	BX
BX02	Cavidine	BX
BX03	Baicalein	BX
BX04	Beta-sitosterol	HP, BX, ZS, FL, SJ
BX05	Stigmasterol	BX, BS, SJ
BX06	Gondoic acid	BX, ZS
BX07	Coniferin	BX
BX08	10,13-Eicosadienoic	BX
BX09	Cycloartenol	BX
BX10	Baicalin	BX
BX11	Xanthosine	BX
BZ01	Mandenol	BZ
BZ02	Ethyl oleate	BZ
BZ03	Linolein	BZ
BZ04	Coumarin	BZ
CP01	Sitosterol	CP, GC
CP02	Citromitin	CP
CP03	Nobiletin	CP
CP04	Naringenin	CP, GC
CP05	Hesperidin	CP
DFP01	Arecoline	DFP
DFP02	Arecolidine	DFP
FL01	Trametenolic acid	FL
FL02	Stellasterol	FL
FL03	Eburicoic acid	FL
FL04	Hederagenin	FL
FL05	16 Alpha-hydroxy dehydrotrametenolic acid	FL
FL06	Dehydropachymic acid	FL
FL07	Cerevisterol	FL
FL08	Dehydrotumulosic acid	FL
FL09	Polyporenic acid C	FL
FL10	pachymic acid	FL
FL11	Poricoic acid A	FL
FL12	Poricoic acid B	FL
FL13	poricoic acid C	FL
GC01	Mairin	GC
GC02	Jaranol	GC
GC03	Isorhamnetin	GC
GC04	Formononetin	GC
GC05	Calycosin	GC
GC06	Kaempferol	GC
GC07	Licochalcone A	GC
GC08	Maackiain	GC
GC09	Liquiritigenin	GC
GC10	Glycyrol	GC
GC11	Medicarpin	GC
GC12	Lupiwighteone	GC
GC13	7-Methoxy-2-methylisoflavone	GC
GC14	Shinflavanone	GC
GC15	Euchrenone	GC
GC16	Glyasperin B	GC
GC17	Glyasperin F	GC
GC18	Isotrifoliol	GC
GC19	Kanzonol B	GC
GC20	Semilicoisoflavone B	GC
GC21	Glepidotin A	GC
GC22	Glepidotin B	GC
GC23	Glypallichalcone	GC
GC24	Kanzonol U	GC
GC25	Licochalcone B	GC
GC26	Licochalcone G	GC
GC27	Licoricone	GC
GC28	Gancaonin A	GC
GC29	Gancaonin B	GC
GC30	Gancaonin L	GC
GC31	Gancaonin M	GC
GC32	6-Prenyl luteolin	GC
GC33	Licocoumarone	GC
GC34	Licoisoflavone	GC
GC35	Licoisoflavone B	GC
GC36	Licoisoflavanone	GC
GC37	Shinpterocarpin	GC
GC38	5-Prenylbutein	GC
GC39	Liquiritin	GC
GC40	Glyzaglabrin	GC
GC41	Glabranin	GC
GC42	Glabrone	GC
GC43	Hedysar imcoumestan B	GC
GC44	Eurycarpin A	GC
GC45	Medicocarpin	GC
GC46	Sigmoidin-B	GC
GC47	Dihydrochromen-4-one	GC
GC48	Isobavachin	GC
GC49	Isoglycyrol	GC
GC50	Isolicoflavonol	GC
GC51	Isoformononetin	GC
GC52	1-Methoxyphaseollidin	GC
GC53	5-Icosenoic acid	GC
GC54	Kanzonol F	GC
GC55	6-Prenylated eriodictyol	GC
GC56	7-Acetoxy-2-methyl isoflavone	GC
GC57	8-Prenylated eriodictyol	GC
GC58	Gadelaidic acid	GC
GC59	Gancaonin G	GC
GC60	Gancaonin H	GC
GC61	Licoagrocarpin	GC
GC62	Glyasperins M	GC
GC63	Glycyrrhiza flavonol A	GC
GC64	Licoagroisoflavone	GC
GC65	18α-Hydroxyglycyrrhetic acid	GC
GC66	Odoratin	GC
GC67	Phaseol	GC
GC68	Xambioona	GC
GC69	Glycyrrhizic acid	GC
GHX01	Genkwanin	GHX
GHX02	Pachypodol	GHX
GHX03	5-Hydroxy-7,4'-dimethoxy flavanone	GHX
GHX04	Irisolidone	GHX
GHX05	Patchouli alcohol	GHX
GHX06	Quercetin	GHX,GC
GHX07	Rutin	GHX,GC
GHX08	Pogostone	GHX
HP01	Magnolol	HP
HP02	Honokiol	HP
HP03	Neohesperidin	HP
SJ01	6-Methylgingediacetate2	SJ
SJ02	Curcumin	SJ
ZS01	Gamma-homolinolenic acid	ZS
ZS02	Cholesterol	ZS, BZ
ZS03	Beta-dihydrofucosterol	ZS, SJ
ZS04	Linolenic acid ethyl ester	ZS
ZS05	11,14-Eicosadienoic acid methyl ester	ZS, BZ
ZS06	Luteolin	ZS
ZS07	Perillyl alcohol	ZS
