# Supplementary material for: Systems Pharmacology Dissection of Multi-Scale Mechanisms of Action of Huo-Xiang-Zheng-Qi Formula for the Treatment of Gastrointestinal Diseases
Source: Front Pharmacol. 2019 Jan 11;9:1448. doi: 10.3389/fphar.2018.01448 (PMC6336928; doi:10.3389/fphar.2018.01448)
Supplement: Supplementary file 3 [file Table_3.xlsx]

## Sheet: Sheet1
Table S3: The p-value and FDR of GO terms
regulation of system process	p-Value	FDR
second-messenger-mediated signaling	3.1267e-16	5.55112e-13
circulatory system process	7.50083e-13	1.23948e-09
blood circulation	1.5469e-11	2.55623e-08
regulation of nucleotide biosynthetic process	1.5469e-11	2.55623e-08
neurological system process	8.0703e-10	1.33361e-06
regulation of cell proliferation	1.65178e-09	2.72956e-06
response to alkaloid	2.25251e-09	3.72226e-06
response to stress	2.648e-09	4.37579e-06
regulation of adenylate cyclase activity	5.57635e-09	9.21488e-06
muscarinic acetylcholine receptor signaling pathway	6.51183e-09	1.07607e-05
regulation of smooth muscle contraction	9.51686e-08	0.000157265
monoamine transport	5.27589e-07	0.000871834
phosphoinositide-mediated signaling	6.73407e-07	0.00111279
regulation of ion transport	1.88807e-06	0.00311998
catecholamine transport	3.76542e-06	0.00622215
regulation of potassium ion transport	6.02234e-06	0.00995141
regulation of phospholipase activity	8.57731e-06	0.014173
response to steroid hormone stimulus	1.22943e-05	0.0203143
response to hormone stimulus	1.62117e-05	0.0267864
regulation of metal ion transport	2.25532e-05	0.0372625
	2.34211e-05	0.0386962
